# Supplementary material for: Clinical and immune responses to neoadjuvant fulvestrant with or without enzalutamide in ER+/Her2− breast cancer
Source: PubMed Central journal article supplement — NPJ Breast Cancer. 2024 Oct 6;10:88. doi: 10.1038/s41523-024-00697-5 (PMC11455938; doi:10.1038/s41523-024-00697-5), 2024-10-06
Supplement: 41523_2024_697_MOESM1_ESM.pdf [file 41523_2024_697_MOESM1_ESM.pdf]

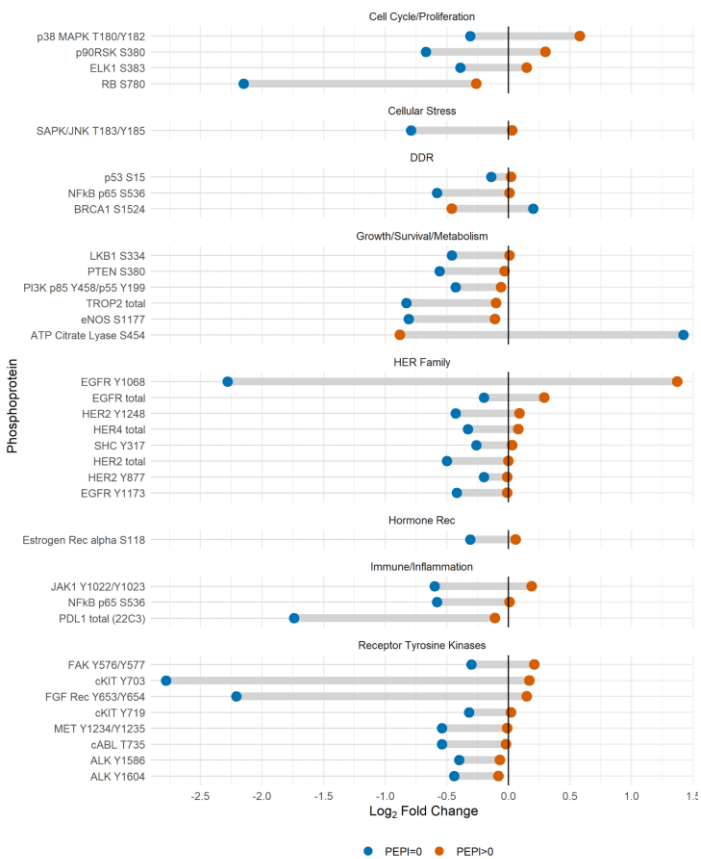

| Phosphoprotein          | PEPI=0 (N=7)<br>Mean(SD) | PEPI>0 (N=22)<br>Mean(SD) | Mean Diff | p-value |
|-------------------------|--------------------------|---------------------------|-----------|---------|
| MET Y1234/Y1235         | -0.54 (0.46)             | -0.01 (0.29)              | -0.52     | 0.002   |
| EGFR Y1068              | -2.28 (3.24)             | 1.37 (2.47)               | -3.64     | 0.003   |
| ALK Y1586               | -0.4 (0.29)              | -0.07 (0.21)              | -0.33     | 0.005   |
| EGFR total              | -0.2 (0.19)              | 0.29 (0.36)               | -0.49     | 0.005   |
| cKIT Y719               | -0.32 (0.34)             | 0.02 (0.22)               | -0.34     | 0.007   |
| FGF Rec Y653/Y654       | -2.21 (3.96)             | 0.15 (0.5)                | -2.35     | 0.007   |
| EGFR Y1173              | -0.42 (0.43)             | -0.01 (0.37)              | -0.41     | 0.022   |
| ALK Y1604               | -0.44 (0.41)             | -0.08 (0.31)              | -0.36     | 0.023   |
| HER4 total              | -0.33 (0.35)             | 0.08 (0.41)               | -0.41     | 0.026   |
| SAPK/JNK T183/Y185      | -0.79 (1.23)             | 0.03 (0.65)               | -0.82     | 0.026   |
| eNOS S1177              | -0.81 (0.87)             | -0.11 (0.63)              | -0.69     | 0.027   |
| Estrogen Rec alpha S118 | -0.31 (0.47)             | 0.06 (0.29)               | -0.37     | 0.029   |
| cABL T735               | -0.54 (0.84)             | -0.02 (0.41)              | -0.52     | 0.032   |
| RB S780                 | -2.15 (3.98)             | -0.28 (0.69)              | -1.89     | 0.032   |
| PI3K p85 Y458/p55 Y199  | -0.43 (0.62)             | -0.06 (0.25)              | -0.37     | 0.033   |
| LKB1 S334               | -0.46 (0.78)             | 0.01 (0.39)               | -0.47     | 0.043   |
| FAK Y576/Y577           | -0.3 (0.69)              | 0.21 (0.54)               | -0.52     | 0.048   |
| PDL1 total (22C3)       | -1.74 (3.85)             | -0.11 (0.38)              | -1.62     | 0.048   |
| HER2 Y877               | -0.2 (0.29)              | -0.01 (0.14)              | -0.19     | 0.050   |
| p90RSK S380             | -0.67 (1.26)             | 0.3 (1.07)                | -0.97     | 0.050   |
| ATP Citrate Lyase S454  | 1.42 (3.81)              | -0.88 (2.31)              | 2.29      | 0.056   |
| BRCA1 S1524             | 0.2 (1.12)               | -0.46 (0.65)              | 0.66      | 0.058   |
| NFkB p65 S536           | -0.58 (0.81)             | 0.01 (0.62)               | -0.59     | 0.063   |
| cKIT Y703               | -2.78 (5.2)              | 0.17 (3.04)               | -2.95     | 0.066   |
| p53 S15                 | -0.14 (0.22)             | 0.02 (0.13)               | -0.16     | 0.069   |
| HER2 Y1248              | -0.43 (0.31)             | 0.09 (0.71)               | -0.52     | 0.071   |
| HER2 total              | -0.5 (0.63)              | 0 (0.63)                  | -0.50     | 0.072   |
| JAK1 Y1022/Y1023        | -0.6 (0.41)              | 0.19 (1.01)               | -0.79     | 0.072   |
| p38 MAPK T180/Y182      | -0.31 (1.02)             | 0.58 (1.07)               | -0.88     | 0.075   |
| PTEN S380               | -0.56 (0.86)             | -0.03 (0.59)              | -0.52     | 0.076   |
| SHC Y317                | -0.26 (0.28)             | 0.03 (0.35)               | -0.29     | 0.084   |
| ELK1 S383               | -0.39 (0.93)             | 0.15 (0.59)               | -0.54     | 0.089   |
| TROP2 total             | -0.83 (0.52)             | -0.1 (1.07)               | -0.74     | 0.089   |
| Cyclin D1 total         | -1.53 (1.01)             | -0.79 (1.02)              | -0.74     | 0.101   |
| ERK 1/2 T202/Y204       | -0.77 (2.55)             | 0.47 (1.42)               | -1.24     | 0.102   |
| HER3 total              | -0.76 (0.78)             | -0.16 (0.87)              | -0.60     | 0.106   |
| VEGF Rec2 Y996          | -0.27 (0.23)             | -0.02 (0.32)              | -0.25     | 0.107   |
| p70S6K T412             | -0.29 (0.89)             | 0.19 (0.6)                | -0.48     | 0.110   |
| PTEN total              | -0.72 (0.95)             | -0.21 (0.65)              | -0.51     | 0.117   |
| mTOR S2448              | -0.42 (0.5)              | -0.09 (0.46)              | -0.33     | 0.118   |
| HER3 Y1289              | -0.28 (0.33)             | -0.03 (0.35)              | -0.25     | 0.119   |
| M-CSF Rec Y723          | -0.16 (0.18)             | 0.02 (0.23)               | -0.18     | 0.126   |
| 4EBP1 S65               | -0.49 (1.23)             | 0.11 (0.87)               | -0.60     | 0.156   |
| PRK1 T774/PRK2 T816     | -0.54 (0.6)              | -0.13 (0.62)              | -0.42     | 0.156   |
| elF4G S1108             | -0.54 (0.42)             | -0.01 (0.89)              | -0.54     | 0.160   |
| RAF S259                | -0.35 (0.44)             | -0.05 (0.44)              | -0.30     | 0.167   |
| FOXO1 T24/FOXO3a T32    | -0.16 (0.26)             | 0.16 (0.6)                | -0.33     | 0.175   |
| GSK3aB S21/S9           | -0.61 (1.08)             | -0.04 (0.95)              | -0.58     | 0.177   |
| AMPKalpha1 S485         | 2.12 (3.94)              | -0.39 (4.04)              | 2.51      | 0.179   |
| PKA C T197              | -0.37 (0.25)             | -0.03 (0.61)              | -0.34     | 0.200   |

**Supplementary Figure 2. RPPA change with treatment in the combination arm for PEPI=0 vs. PEPI>0.** Dumbbell plot of the mean log<sub>2</sub> fold change in expression with treatment (W5–BL) in the Combo arm by PEPI score (blue: PEPI=0 (N=7), orange: PEPI>0 (N=22)) and phosphoprotein. Presented phosphoproteins on the left-hand side were significantly (*p*<0.1) differently expressed with treatment by the Empirical Bayes moderated t-test. The corresponding table on the right presents all phosphoproteins with *p*<0.2. Results are summarized in log2 units with the mean and standard deviation (SD) among patients with PEPI=0 and PEPI>0 in the 2nd and 3rd columns, respectively. “Mean Diff” is the mean change among PEPI>0 patients (column 3) subtracted from the mean change among patients with PEPI=0 (column 2).

| Phosphoprotein                               | PEPI=0 (N=9)<br>Mean(SD) | PEPI>0 (N=45)<br>Mean(SD) | Mean Diff | p-value |
|----------------------------------------------|--------------------------|---------------------------|-----------|---------|
| Cyclin B1 total                              | 11.79 (1.6)              | 13.65 (0.93)              | -1.85     | <0.001  |
| Ki67 total                                   | 11.47 (1.71)             | 13.67 (1.59)              | -2.21     | <0.001  |
| Cyclin D1 total                              | 10.28 (5.91)             | 13.57 (1.1)               | -3.29     | 0.001   |
| H2A.X S139                                   | 11.45 (1.98)             | 13.06 (1.06)              | -1.61     | 0.001   |
| RB S780                                      | 11.68 (1.31)             | 12.91 (0.9)               | -1.23     | 0.001   |
| PDL1 total (22C3)                            | 10.6 (4.23)              | 12.69 (0.78)              | -2.09     | 0.002   |
| p70S6K S371                                  | 11.42 (1.61)             | 12.82 (1.19)              | -1.39     | 0.003   |
| p53 S15                                      | 14.26 (0.27)             | 14.49 (0.14)              | -0.23     | 0.004   |
| LKB1 S334                                    | 11.76 (1.99)             | 13.04 (0.95)              | -1.29     | 0.004   |
| EGFR Y992                                    | 11.3 (0.58)              | 9.87 (1.48)               | 1.43      | 0.006   |
| FOXO3a S253                                  | 13.81 (0.24)             | 14.02 (0.15)              | -0.21     | 0.006   |
| FOXM1 T600                                   | 12.33 (1.13)             | 13.11 (0.66)              | -0.79     | 0.006   |
| SGK1 S78                                     | 13.7 (0.7)               | 14.17 (0.37)              | -0.48     | 0.006   |
| HER2 Y877                                    | 14.24 (0.43)             | 14.57 (0.28)              | -0.33     | 0.007   |
| 4EBP1 S65                                    | 11.2 (1.88)              | 12.54 (1.26)              | -1.34     | 0.009   |
| PRAS40 T246                                  | 11.3 (4.33)              | 13.06 (0.89)              | -1.76     | 0.013   |
| RAS-GRF1 S916                                | 11.98 (1.03)             | 12.7 (0.7)                | -0.72     | 0.013   |
| PLK1 T210                                    | 13.44 (0.7)              | 13.87 (0.42)              | -0.43     | 0.019   |
| Androgen Rec S81                             | 13.6 (0.48)              | 13.93 (0.34)              | -0.33     | 0.021   |
| MLH1 total                                   | 12.01 (1.32)             | 12.78 (0.77)              | -0.76     | 0.021   |
| HER3 total                                   | 13.76 (1.6)              | 14.58 (0.8)               | -0.82     | 0.023   |
| SMAD2 S245/S250/S255                         | 12.61 (0.73)             | 13.18 (0.67)              | -0.57     | 0.028   |
| MSH2 total                                   | 12.65 (1.18)             | 13.33 (0.77)              | -0.68     | 0.033   |
| FOXO1 S256                                   | 13.53 (1.12)             | 14.21 (0.8)               | -0.67     | 0.035   |
| Acetyl CoA Carboxylase S79                   | 12.67 (1.58)             | 13.79 (1.39)              | -1.12     | 0.035   |
| HSP90a T5/T7                                 | 10.57 (2.22)             | 12.16 (2)                 | -1.59     | 0.035   |
| Androgen Rec S650                            | 12.22 (2.22)             | 13.78 (2)                 | -1.56     | 0.038   |
| S6RP S240/S244                               | 4.85 (5.92)              | 8.66 (5.01)               | -3.81     | 0.045   |
| EGFR Y1068                                   | 11.68 (1.39)             | 8.43 (4.78)               | 3.25      | 0.046   |
| FGF Rec Y653/Y654                            | 11.57 (1.47)             | 12.3 (0.89)               | -0.73     | 0.049   |
| PRK1 T774/PRK2 T816                          | 12.74 (1.37)             | 13.32 (0.62)              | -0.58     | 0.049   |
| cKIT Y719                                    | 13.2 (0.65)              | 13.54 (0.41)              | -0.35     | 0.05    |
| PDK1 S241                                    | 13.12 (1.34)             | 13.81 (0.85)              | -0.68     | 0.052   |
| RAF S259                                     | 12.72 (1.08)             | 13.2 (0.53)               | -0.48     | 0.054   |
| 4EBP1 T70                                    | 12.07 (1.1)              | 12.92 (1.21)              | -0.85     | 0.067   |
| Androgen Rec alpha total DAKO                | 13.36 (1.22)             | 13.92 (0.75)              | -0.56     | 0.071   |
| ALK Y1604                                    | 12.6 (0.65)              | 12.23 (0.55)              | 0.37      | 0.079   |
| MEK 1/2 S217/S221                            | 13.38 (1.09)             | 13.94 (0.83)              | -0.56     | 0.084   |
| MET Y1234/Y1235                              | 12.41 (1.42)             | 13.02 (0.85)              | -0.61     | 0.088   |
| PTEN S380                                    | 13.64 (1.06)             | 14.16 (0.79)              | -0.52     | 0.092   |
| STAT3 S727                                   | 11.32 (4.48)             | 12.67 (1.53)              | -1.35     | 0.104   |
| HER4 total                                   | 13.98 (0.79)             | 14.38 (0.64)              | -0.40     | 0.108   |
| cABL T735                                    | 13.62 (0.79)             | 13.92 (0.48)              | -0.31     | 0.127   |
| ATR S428                                     | 13.45 (0.97)             | 13.86 (0.68)              | -0.41     | 0.13    |
| eNOS S1177                                   | 12.7 (1.34)              | 13.32 (1.08)              | -0.62     | 0.134   |
| IGF1 Rec Y1135/Y1136-Insulin Rec Y1150/Y1151 | 2.79 (5.56)              | 5.78 (5.6)                | -2.99     | 0.144   |
| PKA C T197                                   | 13.38 (0.91)             | 13.8 (0.77)               | -0.42     | 0.155   |
| CREB S133                                    | 13 (1.37)                | 13.44 (0.79)              | -0.44     | 0.19    |
| mTOR S2448                                   | 13.89 (0.98)             | 14.19 (0.54)              | -0.30     | 0.196   |

**Supplementary Figure 3. RPPA by PEPI at baseline.** Phosphoproteins that were significantly ( $p<0.2$ , eBayes moderated t-test) differentially expressed at BL between patients with PEPI =0 (N=9) and PEPI>0 (N=45) are presented in log2 units. The mean and standard deviation (SD) among patients with PEPI=0 and PEPI>0 are presented in columns 2 and 3, respectively. “Mean Diff” is the mean among patients with PEPI>0 (column 3) subtracted from the mean among patients with PEPI =0 (column 2).

| Phosphoprotein                | PEPI=0 (N=9)<br>Mean(SD) | PEPI>0 (N=45)<br>Mean(SD) | Mean Diff | p-value |
|-------------------------------|--------------------------|---------------------------|-----------|---------|
| Androgen Rec total CST        | -4.09 (4.17)             | -0.87 (2.4)               | -3.23     | 0.002   |
| cKIT Y719                     | -0.25 (0.34)             | 0.03 (0.23)               | -0.29     | 0.005   |
| ALK Y1586                     | -0.37 (0.3)              | -0.09 (0.25)              | -0.28     | 0.006   |
| FGF Rec Y653/Y654             | -1.62 (3.63)             | 0 (0.66)                  | -1.62     | 0.006   |
| MET Y1234/Y1235               | -0.41 (0.54)             | -0.03 (0.33)              | -0.38     | 0.008   |
| SAPK/JNK T183/Y185            | -0.82 (1.07)             | -0.12 (0.76)              | -0.70     | 0.021   |
| VEGF Rec2 Y996                | -0.26 (0.2)              | -0.02 (0.27)              | -0.24     | 0.029   |
| EGFR Y1173                    | -0.42 (0.38)             | -0.09 (0.4)               | -0.33     | 0.030   |
| HER3 total                    | -1.03 (0.86)             | -0.27 (0.95)              | -0.76     | 0.030   |
| EGFR total                    | -0.22 (0.17)             | 0.23 (0.58)               | -0.45     | 0.036   |
| HER2 Y1248                    | -0.53 (0.4)              | -0.02 (0.7)               | -0.52     | 0.036   |
| PRK1 T774/PRK2 T816           | -0.78 (1.53)             | -0.13 (0.6)               | -0.66     | 0.037   |
| TROP2 total                   | -1.35 (1.39)             | -0.22 (1.48)              | -1.13     | 0.038   |
| PTEN S380                     | -0.56 (0.89)             | -0.05 (0.63)              | -0.51     | 0.043   |
| 4EBP1 S65                     | -1.1 (2.84)              | -0.07 (0.92)              | -1.04     | 0.045   |
| cABL T735                     | -0.4 (0.78)              | -0.01 (0.45)              | -0.39     | 0.046   |
| ERK 1/2 T202/Y204             | -1.19 (2.36)             | 0.12 (1.67)               | -1.31     | 0.048   |
| PRAS40 T246                   | 1.45 (4.21)              | 0.17 (0.65)               | 1.28      | 0.049   |
| SRC Y527                      | -1.1 (3.9)               | 1.94 (4.01)               | -3.04     | 0.050   |
| YAP S127                      | -0.36 (0.5)              | 0.13 (0.67)               | -0.49     | 0.054   |
| ALK Y1604                     | -0.41 (0.38)             | -0.13 (0.38)              | -0.28     | 0.058   |
| EGFR Y1068                    | -2.04 (2.92)             | 0.58 (3.94)               | -2.62     | 0.061   |
| RB S780                       | -1.46 (3.72)             | -0.35 (0.84)              | -1.12     | 0.067   |
| eNOS S1177                    | -0.73 (0.78)             | -0.16 (0.86)              | -0.57     | 0.069   |
| FAK Y576/Y577                 | -0.28 (0.61)             | 0.09 (0.56)               | -0.37     | 0.082   |
| HER3 Y1289                    | -0.4 (0.38)              | -0.08 (0.5)               | -0.31     | 0.084   |
| HER4 total                    | -0.29 (0.33)             | 0.04 (0.55)               | -0.34     | 0.085   |
| PTEN total                    | -0.62 (0.96)             | -0.18 (0.64)              | -0.44     | 0.089   |
| Androgen Rec alpha total DAKO | -0.8 (0.68)              | -0.27 (0.82)              | -0.53     | 0.090   |
| FOXO1 T24/FOXO3a T32          | -0.27 (0.4)              | 0.15 (0.72)               | -0.41     | 0.101   |
| HER2 Y877                     | -0.16 (0.27)             | -0.03 (0.17)              | -0.13     | 0.102   |
| LKB1 S334                     | -0.3 (0.79)              | -0.01 (0.37)              | -0.28     | 0.104   |
| cKIT Y703                     | -1.95 (4.81)             | 0.13 (3.26)               | -2.08     | 0.109   |
| PKA C T197                    | -0.45 (0.42)             | -0.02 (0.72)              | -0.43     | 0.109   |
| RET Y905                      | -0.76 (1)                | 0.32 (2)                  | -1.08     | 0.117   |
| HER2 total                    | -0.5 (0.57)              | -0.05 (0.82)              | -0.45     | 0.125   |
| PI3K p85 Y458/p55 Y199        | -0.27 (0.63)             | -0.06 (0.28)              | -0.21     | 0.126   |
| Estrogen Rec alpha S118       | -0.2 (0.5)               | 0.02 (0.34)               | -0.22     | 0.133   |
| p90RSK S380                   | -0.52 (1.45)             | 0.17 (1.28)               | -0.70     | 0.147   |
| RAF S259                      | -0.35 (0.53)             | -0.06 (0.51)              | -0.29     | 0.151   |
| mTOR S2448                    | -0.41 (0.47)             | -0.15 (0.51)              | -0.25     | 0.177   |
| M-CSF Rec Y723                | -0.12 (0.18)             | 0.01 (0.24)               | -0.13     | 0.197   |

**Supplementary Figure 4. RPPA by PEPI with treatment.** Phosphoproteins that were significantly (P<0.2, eBayes moderated t-test) differentially expressed with treatment (W5 – BL) between patients with PEPI=0 (N=9) and PEPI>0 (N=45) are presented in log2 units. The mean and standard deviation (SD) among patients with PEPI=0 and PEPI>0 are presented in columns 2 and 3, respectively. “Mean Diff” is the mean change among patients with PEPI>0 (column 3) subtracted from the mean change among patients with PEPI =0 (column 2).

| Phosphoprotein                | High BL/Low W5 (N=13)<br>Mean(SD) | High BL/High W5 (N=9)<br>Mean(SD) | Mean Diff | p-value |
|-------------------------------|-----------------------------------|-----------------------------------|-----------|---------|
| RB S780                       | 12.65 (0.74)                      | 13.71 (0.68)                      | -1.07     | 0.002   |
| Ki67 total                    | 13.57 (1.15)                      | 14.93 (0.79)                      | -1.37     | 0.005   |
| ATR S428                      | 13.83 (0.5)                       | 14.41 (0.45)                      | -0.59     | 0.010   |
| 4EBP1 S65                     | 12.38 (1.15)                      | 13.56 (0.88)                      | -1.18     | 0.015   |
| HER2 Y1248                    | 14.29 (0.69)                      | 13.62 (0.42)                      | 0.67      | 0.016   |
| Cyclin B1 total               | 13.63 (0.97)                      | 14.51 (0.45)                      | -0.88     | 0.019   |
| p70S6K S371                   | 12.84 (0.9)                       | 13.67 (0.65)                      | -0.83     | 0.025   |
| PDK1 S241                     | 13.95 (0.51)                      | 14.52 (0.6)                       | -0.57     | 0.028   |
| CHK1 S345                     | 1.42 (3.48)                       | 5.64 (5.4)                        | -4.22     | 0.031   |
| NFkB p65 S536                 | 12.92 (0.72)                      | 13.54 (0.62)                      | -0.62     | 0.046   |
| cABL T735                     | 13.94 (0.28)                      | 14.25 (0.37)                      | -0.31     | 0.048   |
| p70S6K T412                   | 12.85 (0.6)                       | 13.51 (0.89)                      | -0.65     | 0.048   |
| MEK 1/2 S217/S221             | 14.01 (0.6)                       | 14.56 (0.65)                      | -0.56     | 0.049   |
| HSP90a T5/T7                  | 12.14 (1.25)                      | 13.62 (2.22)                      | -1.47     | 0.052   |
| RAS-GRF1 S916                 | 12.74 (0.51)                      | 13.22 (0.56)                      | -0.48     | 0.055   |
| Androgen Rec S650             | 14.28 (1.16)                      | 12.99 (2.24)                      | 1.29      | 0.082   |
| VEGF Rec2 Y996                | 14.17 (0.31)                      | 13.84 (0.5)                       | 0.33      | 0.087   |
| p27 T187                      | 11.82 (0.87)                      | 12.49 (0.93)                      | -0.68     | 0.090   |
| PRK1 T774/PRK2 T816           | 13.44 (0.4)                       | 13.75 (0.35)                      | -0.31     | 0.091   |
| Estrogen Rec alpha S118       | 13.6 (0.5)                        | 13.99 (0.53)                      | -0.38     | 0.102   |
| PLK1 T210                     | 13.89 (0.27)                      | 14.14 (0.38)                      | -0.25     | 0.112   |
| Androgen Rec alpha total DAKO | 14.25 (0.45)                      | 13.86 (0.65)                      | 0.39      | 0.117   |
| FOXO3a S253                   | 13.98 (0.13)                      | 14.11 (0.1)                       | -0.13     | 0.119   |
| STAT6 Y641                    | 11.94 (2.06)                      | 9.95 (3.97)                       | 1.99      | 0.125   |
| VEGF Rec2 Y951                | 12.49 (0.92)                      | 11.82 (1.22)                      | 0.66      | 0.151   |
| B-RAF S445                    | 12.76 (0.5)                       | 13.24 (1.03)                      | -0.48     | 0.153   |
| EGFR Y1173                    | 13.03 (0.57)                      | 12.66 (0.6)                       | 0.37      | 0.155   |
| eNOS/NOSIII S116              | 10.89 (3.82)                      | 12.8 (1.46)                       | -1.91     | 0.155   |
| HIF-1 alpha total             | 10.95 (3.65)                      | 8 (6.11)                          | 2.95      | 0.156   |
| SGK1 S78                      | 14.21 (0.32)                      | 14.42 (0.24)                      | -0.21     | 0.161   |
| S6RP S235/S236                | 7.41 (5.69)                       | 11.1 (6.46)                       | -3.69     | 0.165   |
| p53 S15                       | 14.49 (0.16)                      | 14.6 (0.12)                       | -0.12     | 0.178   |
| MLH1 total                    | 12.8 (0.63)                       | 13.17 (0.6)                       | -0.37     | 0.181   |
| MET Y1234/Y1235               | 13.39 (0.38)                      | 13.01 (0.89)                      | 0.38      | 0.182   |
| STAT3 Y705                    | 11.94 (3.67)                      | 9.4 (5.46)                        | 2.54      | 0.189   |
| MSH2 total                    | 13.5 (0.59)                       | 13.83 (0.54)                      | -0.33     | 0.196   |

**Supplementary Figure 5. RPPA by Ki67 at baseline.** Phosphoproteins that were significantly ( $p<0.2$ , eBayes moderated t-test) differentially expressed at BL between patients with High BL/Low W5 Ki67 (N=13) and High BL/High W5 Ki67 (N=9) are presented in log2 units. The mean and standard deviation (SD) among patients with High BL/Low W5 and High BL/High W5 Ki67 are presented in columns 2 and 3, respectively. “Mean Diff” is the mean among patients with High BL/High W5 (column 3) subtracted from the mean among patients with High BL/Low W5 (column 2).

| Phosphoprotein                               | High BL/Low W5 (N=13)<br>Mean(SD) | High BL/High W5 (N=9)<br>Mean(SD) | Mean Diff | p-value |
|----------------------------------------------|-----------------------------------|-----------------------------------|-----------|---------|
| FGF Rec Y653/Y654                            | -0.41 (0.73)                      | 0.23 (0.35)                       | -0.63     | 0.024   |
| MET Y1234/Y1235                              | -0.26 (0.34)                      | 0.06 (0.21)                       | -0.32     | 0.031   |
| eIF4G S1108                                  | -0.54 (0.51)                      | 0.23 (1.11)                       | -0.77     | 0.039   |
| HER2 Y1248                                   | -0.24 (0.7)                       | 0.31 (0.45)                       | -0.55     | 0.046   |
| CHK1 S345                                    | 0.83 (4.75)                       | -3.51 (4.95)                      | 4.34      | 0.048   |
| FOXO1 S256                                   | -0.29 (0.68)                      | 0.24 (0.5)                        | -0.52     | 0.059   |
| Androgen Rec total CST                       | -1.34 (1.56)                      | -0.08 (1.58)                      | -1.26     | 0.068   |
| Ki67 total                                   | -2.72 (1.49)                      | -1.55 (1.41)                      | -1.17     | 0.072   |
| Androgen Rec S650                            | -1.45 (1.25)                      | -0.54 (1)                         | -0.91     | 0.074   |
| mTOR S2448                                   | -0.36 (0.37)                      | -0.06 (0.33)                      | -0.29     | 0.076   |
| RAS-GRF1 S916                                | -0.32 (0.52)                      | 0.07 (0.42)                       | -0.40     | 0.076   |
| MEK 1/2 S217/S221                            | -0.78 (0.7)                       | -0.24 (0.65)                      | -0.54     | 0.077   |
| AXL Y702                                     | 0.24 (1.16)                       | -0.56 (0.8)                       | 0.79      | 0.081   |
| IGF1 Rec Y1135/Y1136-Insulin Rec Y1150/Y1151 | -0.12 (0.71)                      | 1.78 (3.79)                       | -1.90     | 0.081   |
| ATR S428                                     | -0.45 (0.43)                      | -0.14 (0.3)                       | -0.31     | 0.085   |
| LKB1 S334                                    | -0.33 (0.48)                      | 0.04 (0.49)                       | -0.37     | 0.096   |
| eNOS S1177                                   | -0.44 (0.83)                      | 0.15 (0.73)                       | -0.58     | 0.099   |
| PTEN S380                                    | -0.29 (0.54)                      | 0.13 (0.64)                       | -0.43     | 0.101   |
| PRK1 T774/PRK2 T816                          | -0.27 (0.42)                      | 0.04 (0.42)                       | -0.32     | 0.109   |
| AMPKalpha T172                               | -0.39 (0.71)                      | 0.16 (0.86)                       | -0.55     | 0.117   |
| MLH1 total                                   | -0.56 (0.5)                       | -0.13 (0.78)                      | -0.43     | 0.124   |
| CHK2 S33/S35                                 | -0.89 (1.71)                      | 0.2 (0.33)                        | -1.09     | 0.136   |
| PI3K p85 Y458/p55 Y199                       | -0.3 (0.46)                       | -0.04 (0.18)                      | -0.26     | 0.139   |
| Androgen Rec alpha total DAKO                | -0.37 (0.5)                       | 0.02 (0.67)                       | -0.39     | 0.141   |
| RET Y905                                     | -0.13 (0.5)                       | 0.15 (0.31)                       | -0.28     | 0.148   |
| RAF S259                                     | -0.19 (0.41)                      | 0.07 (0.35)                       | -0.26     | 0.149   |
| Caspase 3, cleaved D175                      | -1.01 (2.9)                       | 0.5 (1.32)                        | -1.50     | 0.153   |
| SHC Y317                                     | -0.15 (0.32)                      | 0.06 (0.29)                       | -0.22     | 0.153   |
| GSK3aB S21/S9                                | -0.27 (0.92)                      | 0.32 (1.01)                       | -0.60     | 0.155   |
| SMAD2 S245/S250/S255                         | -0.44 (0.4)                       | -0.12 (0.61)                      | -0.32     | 0.155   |
| S6RP S240/S244                               | -4.9 (4.99)                       | -2.07 (3.84)                      | -2.83     | 0.156   |
| S6RP S235/S236                               | -3.52 (7.57)                      | 0.55 (4.69)                       | -4.07     | 0.159   |
| VEGF Rec2 Y996                               | -0.14 (0.28)                      | 0.03 (0.19)                       | -0.17     | 0.172   |
| Glucocorticoid Rec S211                      | -0.21 (1.11)                      | 0.34 (0.58)                       | -0.55     | 0.184   |
| PTEN total                                   | -0.42 (0.54)                      | -0.05 (0.75)                      | -0.37     | 0.188   |
| HER3 Y1289                                   | -0.19 (0.52)                      | 0.08 (0.32)                       | -0.27     | 0.190   |
| RB S780                                      | -1.39 (2.95)                      | -0.08 (0.54)                      | -1.31     | 0.194   |

**Supplementary Figure 6. RPPA by Ki67 with treatment.** Phosphoproteins that were significantly ( $p<0.2$ , eBayes moderated t-test) differentially expressed with treatment (W5 – BL) between patients with High BL/Low W5 Ki67 (N=13) and High BL/High W5 Ki67 (N=9) are presented in log2 units. The mean and standard deviation (SD) among patients with High BL/Low W5 and High BL/High W5 Ki67 are presented in columns 2 and 3, respectively. “Mean Diff” is the mean change among patients with High BL/High W5 (column 3) subtracted from the mean change among patients with High BL/Low W5 (column 2).

**a** Baseline: ILC vs IDC RPPA Analysis

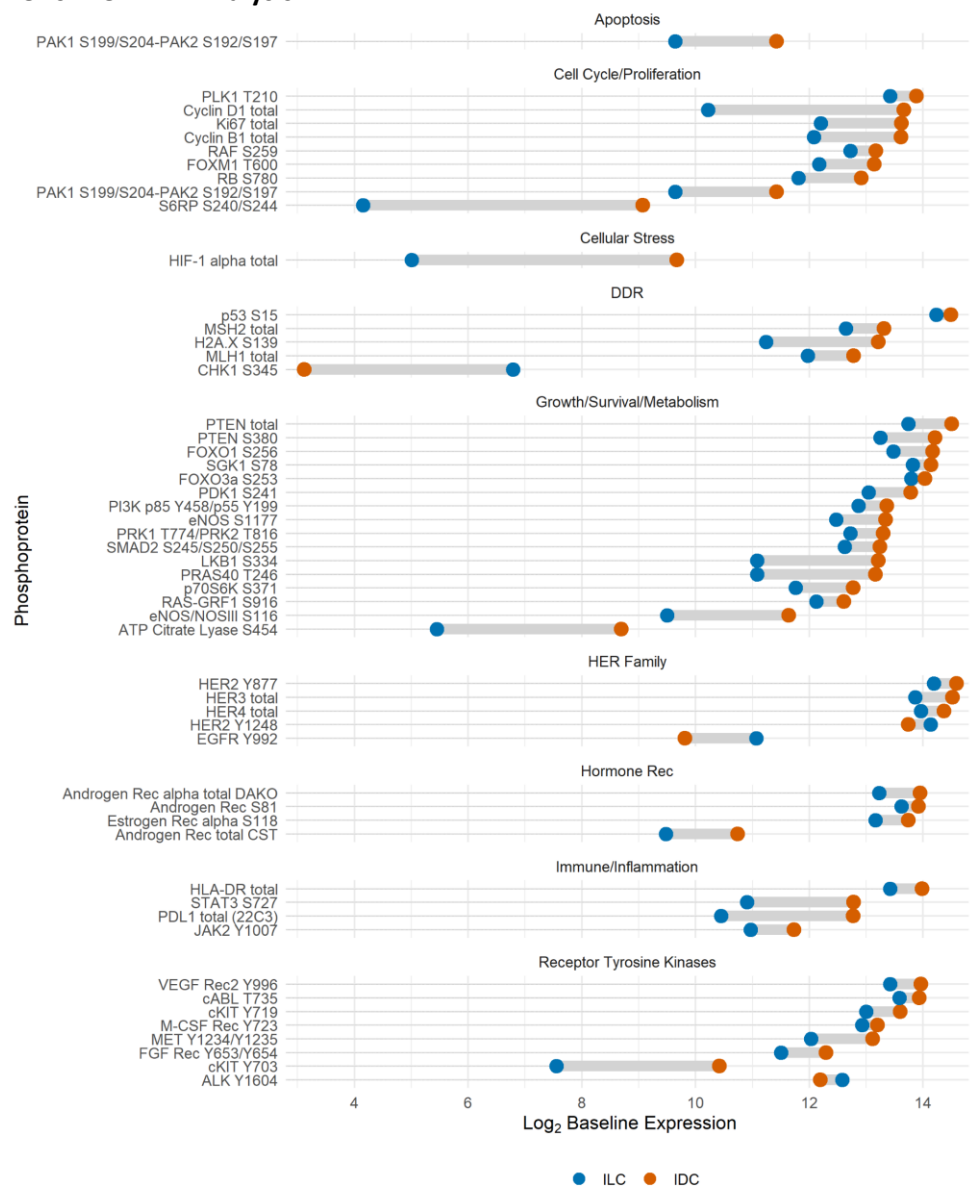

**b** Change with Treatment: ILC vs IDC RPPA Analysis

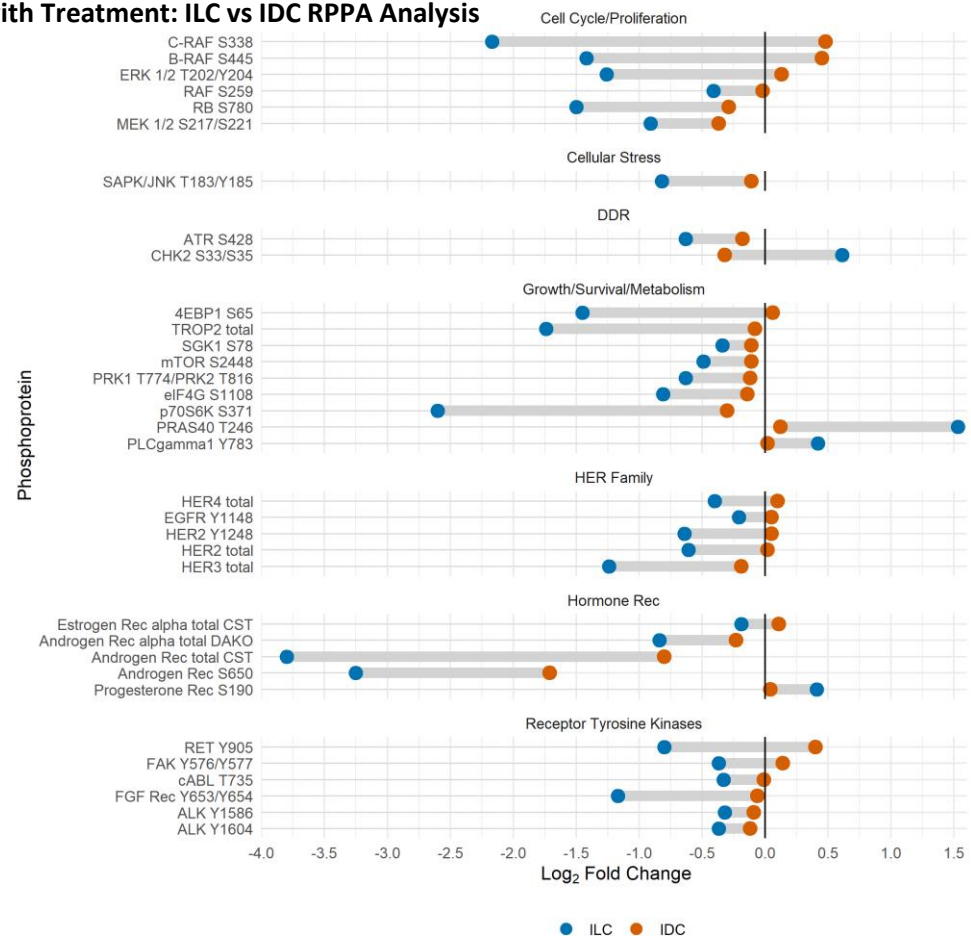

**Supplementary Figure 7. RPPA by Histology (ILC vs IDC).** Reverse phase phospho-protein analysis (RPPA) was performed on laser-captured, fresh frozen tumor that was split into two groups for comparison: ILC (blue, N=10) tumors, and IDC (orange, N=41) tumors. Tumors came from patients in both arms. Presented phosphoproteins were significantly ( $p < 0.1$ ) differentially expressed by the Empirical Bayes moderated t-test. **a** Dumbbell plot of the mean log<sub>2</sub> baseline expression for patients with ILC and IDC for each significant phosphoprotein. **b** Dumbbell plot of the mean log<sub>2</sub> change in expression among patients with ILC and IDC for each significant phosphoprotein.

| Phosphoprotein                               | ILC (N=10)<br>Mean(SD) | IDC (N=41)<br>Mean(SD) | Mean Diff | p-value |
|----------------------------------------------|------------------------|------------------------|-----------|---------|
| p53 S15                                      | 14.23 (0.23)           | 14.49 (0.14)           | -0.26     | <0.001  |
| cKIT Y719                                    | 13 (0.5)               | 13.6 (0.4)             | -0.60     | <0.001  |
| Cyclin B1 total                              | 12.08 (1.81)           | 13.61 (0.93)           | -1.52     | <0.001  |
| Cyclin D1 total                              | 10.22 (5.6)            | 13.66 (0.94)           | -3.44     | <0.001  |
| FOXO1 T600                                   | 12.17 (1.08)           | 13.14 (0.61)           | -0.97     | <0.001  |
| H2A.X S139                                   | 11.24 (1.76)           | 13.21 (0.94)           | -1.97     | <0.001  |
| LKB1 S334                                    | 11.08 (1.63)           | 13.21 (0.74)           | -2.14     | <0.001  |
| PDL1 total (22C3)                            | 10.45 (3.85)           | 12.77 (0.74)           | -2.33     | <0.001  |
| FOXO3a S253                                  | 13.79 (0.21)           | 14.03 (0.15)           | -0.25     | 0.001   |
| HER2 Y877                                    | 14.19 (0.36)           | 14.59 (0.28)           | -0.39     | 0.001   |
| PTEN S380                                    | 13.25 (1)              | 14.21 (0.69)           | -0.96     | 0.001   |
| MET Y1234/Y1235                              | 12.03 (0.98)           | 13.11 (0.89)           | -1.08     | 0.001   |
| PRAS40 T246                                  | 11.08 (4.12)           | 13.16 (0.71)           | -2.07     | 0.003   |
| RB S780                                      | 11.81 (1.49)           | 12.91 (0.85)           | -1.10     | 0.003   |
| PTEN total                                   | 13.74 (0.81)           | 14.5 (0.74)            | -0.76     | 0.006   |
| S6RP S240/S244                               | 4.15 (5.46)            | 9.07 (4.89)            | -4.92     | 0.007   |
| MLH1 total                                   | 11.97 (1.09)           | 12.78 (0.83)           | -0.82     | 0.011   |
| SMAD2 S245/S250/S255                         | 12.62 (0.46)           | 13.24 (0.7)            | -0.62     | 0.011   |
| PLK1 T210                                    | 13.42 (0.62)           | 13.88 (0.44)           | -0.46     | 0.012   |
| EGFR Y992                                    | 11.07 (0.97)           | 9.81 (1.51)            | 1.26      | 0.014   |
| HIF-1 alpha total                            | 5.01 (5.43)            | 9.67 (5.29)            | -4.66     | 0.015   |
| Androgen Rec alpha total DAKO                | 13.23 (1.12)           | 13.95 (0.72)           | -0.71     | 0.016   |
| VEGF Rec2 Y996                               | 13.42 (0.67)           | 13.96 (0.59)           | -0.54     | 0.016   |
| PI3K p85 Y458/p55 Y199                       | 12.86 (0.61)           | 13.36 (0.57)           | -0.50     | 0.021   |
| STAT3 S727                                   | 10.9 (3.98)            | 12.78 (1.62)           | -1.87     | 0.021   |
| Estrogen Rec alpha S118                      | 13.16 (0.8)            | 13.74 (0.66)           | -0.58     | 0.023   |
| HLA-DR total                                 | 13.42 (0.58)           | 13.98 (0.68)           | -0.56     | 0.023   |
| Ki67 total                                   | 12.2 (1.94)            | 13.62 (1.68)           | -1.42     | 0.023   |
| FOXO1 S256                                   | 13.48 (0.71)           | 14.17 (0.87)           | -0.69     | 0.024   |
| PDK1 S241                                    | 13.04 (1.1)            | 13.78 (0.87)           | -0.74     | 0.027   |
| FGF Rec Y653/Y654                            | 11.5 (1.2)             | 12.29 (0.94)           | -0.79     | 0.028   |
| Androgen Rec S81                             | 13.62 (0.47)           | 13.92 (0.34)           | -0.30     | 0.029   |
| CHK1 S345                                    | 6.79 (4.81)            | 3.12 (4.68)            | 3.67      | 0.029   |
| MSH2 total                                   | 12.64 (0.9)            | 13.31 (0.84)           | -0.67     | 0.03    |
| eNOS S1177                                   | 12.47 (0.85)           | 13.34 (1.16)           | -0.87     | 0.031   |
| p70S6K S371                                  | 11.76 (1.78)           | 12.77 (1.23)           | -1.01     | 0.037   |
| PRK1 T774/PRK2 T816                          | 12.72 (1.06)           | 13.3 (0.71)            | -0.59     | 0.042   |
| PAK1 S199/S204-PAK2 S192/S197                | 9.64 (3.56)            | 11.42 (2.19)           | -1.78     | 0.046   |
| cKIT Y703                                    | 7.55 (5.29)            | 10.42 (3.75)           | -2.87     | 0.048   |
| Androgen Rec total CST                       | 9.48 (3.54)            | 10.74 (1.26)           | -1.26     | 0.061   |
| HER3 total                                   | 13.86 (1.45)           | 14.52 (0.85)           | -0.66     | 0.061   |
| RAF S259                                     | 12.72 (0.87)           | 13.17 (0.59)           | -0.45     | 0.061   |
| ALK Y1604                                    | 12.58 (0.83)           | 12.19 (0.5)            | 0.39      | 0.062   |
| HER2 Y1248                                   | 14.13 (0.6)            | 13.74 (0.57)           | 0.39      | 0.062   |
| SGK1 S78                                     | 13.82 (0.57)           | 14.14 (0.43)           | -0.31     | 0.067   |
| cABL T735                                    | 13.58 (0.62)           | 13.93 (0.52)           | -0.35     | 0.076   |
| RAS-GRF1 S916                                | 12.12 (0.95)           | 12.61 (0.72)           | -0.50     | 0.076   |
| HER4 total                                   | 13.96 (0.75)           | 14.37 (0.65)           | -0.41     | 0.086   |
| ATP Citrate Lyase S454                       | 5.45 (5.85)            | 8.69 (5.22)            | -3.24     | 0.087   |
| M-CSF Rec Y723                               | 12.93 (0.44)           | 13.2 (0.42)            | -0.27     | 0.087   |
| eNOS/NOSIII S116                             | 9.5 (5.09)             | 11.64 (3.16)           | -2.14     | 0.092   |
| JAK2 Y1007                                   | 10.97 (0.93)           | 11.73 (1.36)           | -0.76     | 0.097   |
| EGFR Y1068                                   | 10.88 (4)              | 8.28 (4.66)            | 2.59      | 0.106   |
| HSP90a T5/T7                                 | 10.97 (1.97)           | 12.14 (2.14)           | -1.17     | 0.117   |
| TYK2 Y1054/Y1055                             | 13.61 (0.37)           | 13.86 (0.46)           | -0.25     | 0.135   |
| Cyclin A1 total                              | 14.04 (0.23)           | 14.22 (0.31)           | -0.17     | 0.144   |
| IGF1 Rec Y1135/Y1136-Insulin Rec Y1150/Y1151 | 3.07 (4.98)            | 5.95 (5.74)            | -2.88     | 0.146   |
| CHK2 S33/S35                                 | 9.99 (1.42)            | 10.93 (1.5)            | -0.95     | 0.157   |
| Glucocorticoid Rec S211                      | 12.38 (0.82)           | 11.84 (1.15)           | 0.55      | 0.161   |
| EGFR Y1148                                   | 14.9 (0.2)             | 14.69 (0.47)           | 0.22      | 0.17    |
| S6RP S235/S236                               | 4.32 (5.71)            | 7.68 (6.19)            | -3.36     | 0.18    |
| STAT3 Y705                                   | 8.44 (5.94)            | 10.72 (4.72)           | -2.28     | 0.193   |

**Supplementary Figure 8. RPPA by Histology (ILC vs IDC) at baseline.** Phosphoproteins that were significantly ( $p<0.2$ , eBayes moderated t-test) differentially expressed at BL between patients with ILC (N=10) and IDC (N=41) are presented in log2 units. The mean and standard deviation (SD) among patients with ILC and IDC are presented in columns 2 and 3, respectively. “Mean Diff” is the mean among patients with IDC (column 3) subtracted from the mean among patients with ILC (column 2).

| Phosphoprotein                | ILC (N=10)<br>Mean(SD) | IDC (N=41)<br>Mean(SD) | Mean Diff | p-value |
|-------------------------------|------------------------|------------------------|-----------|---------|
| p70S6K S371                   | -2.6 (3.86)            | -0.3 (1)               | -2.30     | 0.001   |
| 4EBP1 S65                     | -1.45 (2.62)           | 0.06 (0.85)            | -1.51     | 0.002   |
| HER3 total                    | -1.24 (1.31)           | -0.19 (0.8)            | -1.05     | 0.002   |
| TROP2 total                   | -1.74 (2.35)           | -0.08 (1.11)           | -1.66     | 0.002   |
| HER2 Y1248                    | -0.64 (0.64)           | 0.05 (0.64)            | -0.69     | 0.003   |
| Androgen Rec total CST        | -3.8 (4.38)            | -0.8 (2.36)            | -3.00     | 0.004   |
| HER4 total                    | -0.4 (0.56)            | 0.1 (0.49)             | -0.50     | 0.007   |
| FAK Y576/Y577                 | -0.37 (0.75)           | 0.14 (0.51)            | -0.51     | 0.014   |
| SAPK/JNK T183/Y185            | -0.82 (1.1)            | -0.11 (0.75)           | -0.71     | 0.018   |
| ALK Y1586                     | -0.32 (0.36)           | -0.09 (0.24)           | -0.23     | 0.023   |
| HER2 total                    | -0.61 (1.14)           | 0.02 (0.67)            | -0.63     | 0.025   |
| ATR S428                      | -0.63 (0.71)           | -0.18 (0.52)           | -0.45     | 0.027   |
| PRAS40 T246                   | 1.53 (3.94)            | 0.12 (0.63)            | 1.42      | 0.027   |
| MEK 1/2 S217/S221             | -0.91 (0.82)           | -0.37 (0.65)           | -0.54     | 0.028   |
| PLCgamma1 Y783                | 0.42 (0.54)            | 0.02 (0.47)            | 0.40      | 0.032   |
| ERK 1/2 T202/Y204             | -1.26 (2.3)            | 0.13 (1.7)             | -1.39     | 0.033   |
| mTOR S2448                    | -0.49 (0.53)           | -0.11 (0.5)            | -0.38     | 0.037   |
| Androgen Rec alpha total DAKO | -0.84 (1.13)           | -0.23 (0.73)           | -0.62     | 0.042   |
| RB S780                       | -1.5 (3.65)            | -0.29 (0.69)           | -1.20     | 0.045   |
| RAF S259                      | -0.41 (0.67)           | -0.02 (0.48)           | -0.39     | 0.051   |
| Androgen Rec S650             | -3.25 (3.63)           | -1.71 (1.84)           | -1.54     | 0.057   |
| FGF Rec Y653/Y654             | -1.17 (3.6)            | -0.06 (0.65)           | -1.11     | 0.060   |
| eIF4G S1108                   | -0.81 (1.26)           | -0.14 (0.8)            | -0.67     | 0.064   |
| CHK2 S33/S35                  | 0.61 (0.61)            | -0.32 (1.16)           | 0.93      | 0.065   |
| EGFR Y1148                    | -0.21 (0.43)           | 0.05 (0.4)             | -0.26     | 0.075   |
| RET Y905                      | -0.8 (0.98)            | 0.4 (2.07)             | -1.20     | 0.078   |
| B-RAF S445                    | -1.42 (3.22)           | 0.45 (2.83)            | -1.87     | 0.081   |
| ALK Y1604                     | -0.37 (0.5)            | -0.12 (0.37)           | -0.25     | 0.082   |
| C-RAF S338                    | -2.17 (3.58)           | 0.48 (4.22)            | -2.65     | 0.083   |
| Estrogen Rec alpha total CST  | -0.19 (0.72)           | 0.11 (0.41)            | -0.30     | 0.089   |
| Progesterone Rec S190         | 0.41 (0.77)            | 0.04 (0.57)            | 0.37      | 0.092   |
| cABL T735                     | -0.33 (0.75)           | -0.01 (0.48)           | -0.32     | 0.094   |
| PRK1 T774/PRK2 T816           | -0.63 (1.5)            | -0.12 (0.61)           | -0.52     | 0.098   |
| SGK1 S78                      | -0.34 (0.46)           | -0.11 (0.36)           | -0.23     | 0.099   |
| HER2 Y877                     | -0.14 (0.28)           | -0.02 (0.17)           | -0.12     | 0.115   |
| AXL Y702                      | -0.5 (1.23)            | 0.1 (1.07)             | -0.61     | 0.120   |
| p90RSK S380                   | -0.54 (1.44)           | 0.19 (1.32)            | -0.74     | 0.122   |
| PDK1 S241                     | -0.58 (0.84)           | -0.15 (0.75)           | -0.44     | 0.130   |
| eNOS/NOSIII S116              | -1.75 (4.07)           | -0.2 (2.59)            | -1.55     | 0.134   |
| PKA C T197                    | -0.41 (0.87)           | -0.02 (0.66)           | -0.39     | 0.138   |
| SRC Y527                      | -0.32 (4.61)           | 1.95 (4.08)            | -2.27     | 0.143   |
| AKT T308                      | -0.35 (0.48)           | 0.4 (1.62)             | -0.75     | 0.149   |
| MET Y1234/Y1235               | -0.25 (0.61)           | -0.04 (0.33)           | -0.21     | 0.150   |
| FOXM1 T600                    | 0.07 (0.65)            | -0.14 (0.32)           | 0.22      | 0.155   |
| EGFR total                    | -0.07 (0.44)           | 0.21 (0.6)             | -0.28     | 0.179   |

**Supplementary Figure 9. RPPA by Histology (ILC vs IDC) with treatment.** Phosphoproteins that were significantly (P<0.2, eBayes moderated t-test) differentially expressed with treatment (W5 – BL) between patients with ILC (N=10) and IDC (N=41) are presented in log2 units. The mean and standard deviation (SD) among patients with ILC and IDC are presented in columns 2 and 3, respectively. “Mean Diff” is the mean change among patients with IDC (column 3) subtracted from the mean change among patients with ILC(column 2).

| Metabolite                     | PEPI=0 (N=9)<br>Mean(SD) | PEPI>0 (N=41)<br>Mean(SD) | Mean Diff | p-value |
|--------------------------------|--------------------------|---------------------------|-----------|---------|
| acyl-C5:1                      | -1.49 (1.72)             | -0.02 (1.17)              | -1.47     | 0.002   |
| L-asparagine                   | -0.44 (0.43)             | 0.04 (0.44)               | -0.48     | 0.005   |
| Succinate                      | -0.44 (0.45)             | 0 (0.41)                  | -0.44     | 0.007   |
| Malate                         | -0.44 (0.37)             | 0.11 (0.57)               | -0.56     | 0.008   |
| L-alanine                      | -0.36 (0.27)             | 0 (0.37)                  | -0.36     | 0.012   |
| L-Carnitine                    | -0.36 (0.42)             | 0 (0.37)                  | -0.35     | 0.018   |
| Sphinganine 1-phosphate        | 0.33 (0.38)              | -0.18 (0.64)              | 0.50      | 0.027   |
| Dodecanedioic acid             | -0.34 (0.55)             | 0.01 (0.37)               | -0.34     | 0.030   |
| 2-Oxoglutaramate               | 0.39 (0.94)              | -0.13 (0.7)               | 0.52      | 0.059   |
| Lactate                        | -0.28 (0.28)             | 0.15 (0.65)               | -0.43     | 0.061   |
| Mannitol                       | 0.55 (1.4)               | -0.1 (0.84)               | 0.65      | 0.064   |
| Sphingosine 1-phosphate        | -0.31 (0.5)              | 0.16 (0.73)               | -0.47     | 0.068   |
| 2',3'-Cyclic CMP               | 0.5 (1.17)               | -0.14 (0.97)              | 0.64      | 0.085   |
| gamma-L-Glutamyl-D-alanine     | -0.28 (0.59)             | 0.12 (0.66)               | -0.41     | 0.090   |
| Octanoic acid (caprylate)      | 0.46 (1.67)              | -0.31 (1.17)              | 0.77      | 0.096   |
| L-lysine                       | -0.28 (0.46)             | -0.05 (0.34)              | -0.23     | 0.101   |
| UDP                            | -0.1 (0.43)              | 0.21 (0.52)               | -0.31     | 0.102   |
| Glycolate                      | -0.16 (0.29)             | 0.07 (0.38)               | -0.23     | 0.107   |
| 4-Acetamidobutanoate           | 0.84 (1.46)              | -0.31 (2.08)              | 1.15      | 0.111   |
| Guanidinoacetate               | -0.22 (0.55)             | 0.04 (0.43)               | -0.25     | 0.137   |
| 5-6-Dihydrothymine             | -0.07 (0.33)             | 0.17 (0.45)               | -0.24     | 0.138   |
| Citrate                        | -0.19 (0.26)             | 0 (0.35)                  | -0.19     | 0.145   |
| L-Citrulline                   | -0.3 (0.41)              | -0.07 (0.42)              | -0.23     | 0.148   |
| Heptanoic acid                 | 0.24 (0.44)              | 0.02 (0.4)                | 0.22      | 0.151   |
| L-valine                       | -0.23 (0.39)             | -0.03 (0.35)              | -0.20     | 0.156   |
| L-tryptophan                   | 0.09 (0.52)              | -0.14 (0.42)              | 0.24      | 0.159   |
| Choline                        | -0.13 (0.31)             | 0.08 (0.43)               | -0.22     | 0.168   |
| Anthranilate                   | 1 (2.27)                 | 0.06 (1.91)               | 0.94      | 0.190   |
| Inosine                        | 0.58 (1.19)              | -0.09 (1.43)              | 0.66      | 0.191   |
| 2-Hydroxyglutarate/Citramalate | -0.08 (0.52)             | 0.13 (0.4)                | -0.21     | 0.194   |
| 5-Hydroxyisourate              | -0.23 (0.46)             | 0.11 (0.76)               | -0.34     | 0.197   |

**Supplementary Figure 10. Metabolomics by PEPI.** Metabolites that were significantly ( $p<0.2$ , eBayes moderated t-test) differentially expressed with treatment (W5-BL) between patients with PEPI=0 (N=9) and PEPI>0 (N=41) are presented in log2 units. The mean and standard deviation (SD) among patients with PEPI=0 and PEPI> 0 are presented in columns 2 and 3, respectively. “Mean Diff” is the mean change among patients with PEPI> 0 (column 3) subtracted from the mean change among patients with PEPI=0 (column 2).

| Metabolite                             | Combination (N=29)<br>Mean(SD) | Fulvestrant (N=21)<br>Mean(SD) | Mean Diff | p-value |
|----------------------------------------|--------------------------------|--------------------------------|-----------|---------|
| L-Citrulline                           | -0.3 (0.39)                    | 0.16 (0.3)                     | -0.46     | <0.001  |
| acyl-C5:1                              | -0.83 (1.37)                   | 0.47 (1.04)                    | -1.30     | <0.001  |
| octenoyl-l-carnitine (acyl-C8:1)       | -0.65 (0.59)                   | -0.06 (0.65)                   | -0.59     | 0.001   |
| acyl-C4-OH                             | -1.02 (1.34)                   | 0.09 (1.26)                    | -1.11     | 0.004   |
| Bilirubin                              | 0.46 (0.73)                    | -0.19 (0.85)                   | 0.66      | 0.004   |
| butanoyl-l-carnitine (acyl-C4)         | -0.5 (0.75)                    | 0.13 (0.81)                    | -0.63     | 0.006   |
| L-lysine                               | -0.22 (0.39)                   | 0.07 (0.27)                    | -0.29     | 0.007   |
| Ornithine                              | -0.31 (0.4)                    | 0.05 (0.47)                    | -0.35     | 0.007   |
| N-Methylethanolamine phosphate         | -0.37 (0.6)                    | 0.11 (0.6)                     | -0.48     | 0.007   |
| 5-Hydroxyisourate                      | -0.17 (0.67)                   | 0.35 (0.69)                    | -0.52     | 0.009   |
| L-octanoylcarnitine (acyl-C8)          | -1.18 (0.87)                   | -0.45 (1.11)                   | -0.73     | 0.011   |
| gamma-Glutamyl-Se-methylselenocysteine | -0.33 (0.43)                   | 0.03 (0.54)                    | -0.36     | 0.012   |
| O-Decenoyl-L-carnitine (acyl-C10:1)    | -0.97 (1.03)                   | -0.28 (1.01)                   | -0.69     | 0.02    |
| 5-Hydroxyindoleacetate                 | -0.12 (0.8)                    | 0.39 (0.72)                    | -0.51     | 0.023   |
| Picolinic acid                         | 0.12 (0.54)                    | -0.31 (0.79)                   | 0.44      | 0.023   |
| L-proline                              | -0.28 (0.48)                   | 0.01 (0.4)                     | -0.29     | 0.031   |
| Guanidinoacetate                       | -0.13 (0.49)                   | 0.16 (0.35)                    | -0.28     | 0.031   |
| L-valine                               | -0.17 (0.39)                   | 0.06 (0.29)                    | -0.23     | 0.035   |
| Succinate                              | -0.19 (0.43)                   | 0.07 (0.45)                    | -0.26     | 0.045   |
| Sphinganine 1-phosphate                | 0.06 (0.56)                    | -0.29 (0.68)                   | 0.36      | 0.045   |
| S-Glutathionyl-L-cysteine              | 0.36 (1.12)                    | -0.24 (0.95)                   | 0.59      | 0.049   |
| Dodecanedioic acid                     | -0.15 (0.43)                   | 0.08 (0.38)                    | -0.24     | 0.055   |
| 3-Methyleneoxindole                    | -0.27 (1.03)                   | 0.24 (0.76)                    | -0.51     | 0.058   |
| L-phenylalanine                        | -0.14 (0.35)                   | 0.05 (0.34)                    | -0.19     | 0.065   |
| Hypoxanthine                           | 0.04 (0.6)                     | 0.34 (0.56)                    | -0.30     | 0.074   |
| L-methionine                           | -0.25 (0.62)                   | 0.02 (0.4)                     | -0.27     | 0.087   |
| L-Carnitine                            | -0.15 (0.43)                   | 0.05 (0.33)                    | -0.20     | 0.087   |
| Urate                                  | -0.07 (0.28)                   | 0.09 (0.33)                    | -0.16     | 0.089   |
| L-glutamate                            | 0.04 (0.54)                    | 0.31 (0.57)                    | -0.27     | 0.095   |
| Mannitol                               | -0.17 (1.11)                   | 0.27 (0.71)                    | -0.43     | 0.115   |
| 4-Acetamidobutanoate                   | -0.48 (1.94)                   | 0.41 (2.05)                    | -0.89     | 0.115   |
| propionyl-carnitine (acyl-C3)          | -0.3 (0.74)                    | 0 (0.61)                       | -0.31     | 0.122   |
| Sphingosine 1-phosphate                | -0.05 (0.76)                   | 0.25 (0.62)                    | -0.30     | 0.136   |
| 2-Hydroxyglutarate/Citramalate         | 0.17 (0.51)                    | -0.01 (0.24)                   | 0.18      | 0.144   |
| Glycolate                              | -0.04 (0.36)                   | 0.12 (0.38)                    | -0.16     | 0.144   |
| Allantoate                             | -0.27 (0.47)                   | -0.05 (0.61)                   | -0.23     | 0.149   |
| L-aspartate                            | 0.23 (0.46)                    | 0.05 (0.4)                     | 0.18      | 0.167   |
| Glycerol 3-phosphate                   | 0.29 (0.5)                     | 0.1 (0.48)                     | 0.20      | 0.167   |
| N-Acetylornithine                      | -0.38 (1.27)                   | 0.11 (1.19)                    | -0.48     | 0.169   |
| L-Homocysteine                         | -0.35 (1.14)                   | 0.07 (1.02)                    | -0.42     | 0.175   |
| D-Ribose                               | -0.04 (0.39)                   | 0.13 (0.45)                    | -0.17     | 0.177   |
| L-Adrenaline                           | -0.21 (0.48)                   | -0.02 (0.53)                   | -0.19     | 0.195   |
| Diphosphate                            | 0.3 (1.08)                     | -0.09 (1.05)                   | 0.39      | 0.196   |

**Supplementary Figure 11. Metabolomics by arm.** Metabolites that were significantly ( $p<0.2$ , eBayes moderated t-test) differentially expressed with treatment between patients with Combo (N=29) and Fulv (N=21) arms are presented in log2 units. The mean and standard deviation (SD) among patients with Combo and Fulv are presented in columns 2 and 3, respectively. “Mean Diff” is the mean change among Fulv patients (column 3) subtracted from the mean change among patients in the Combo arm (column 2).

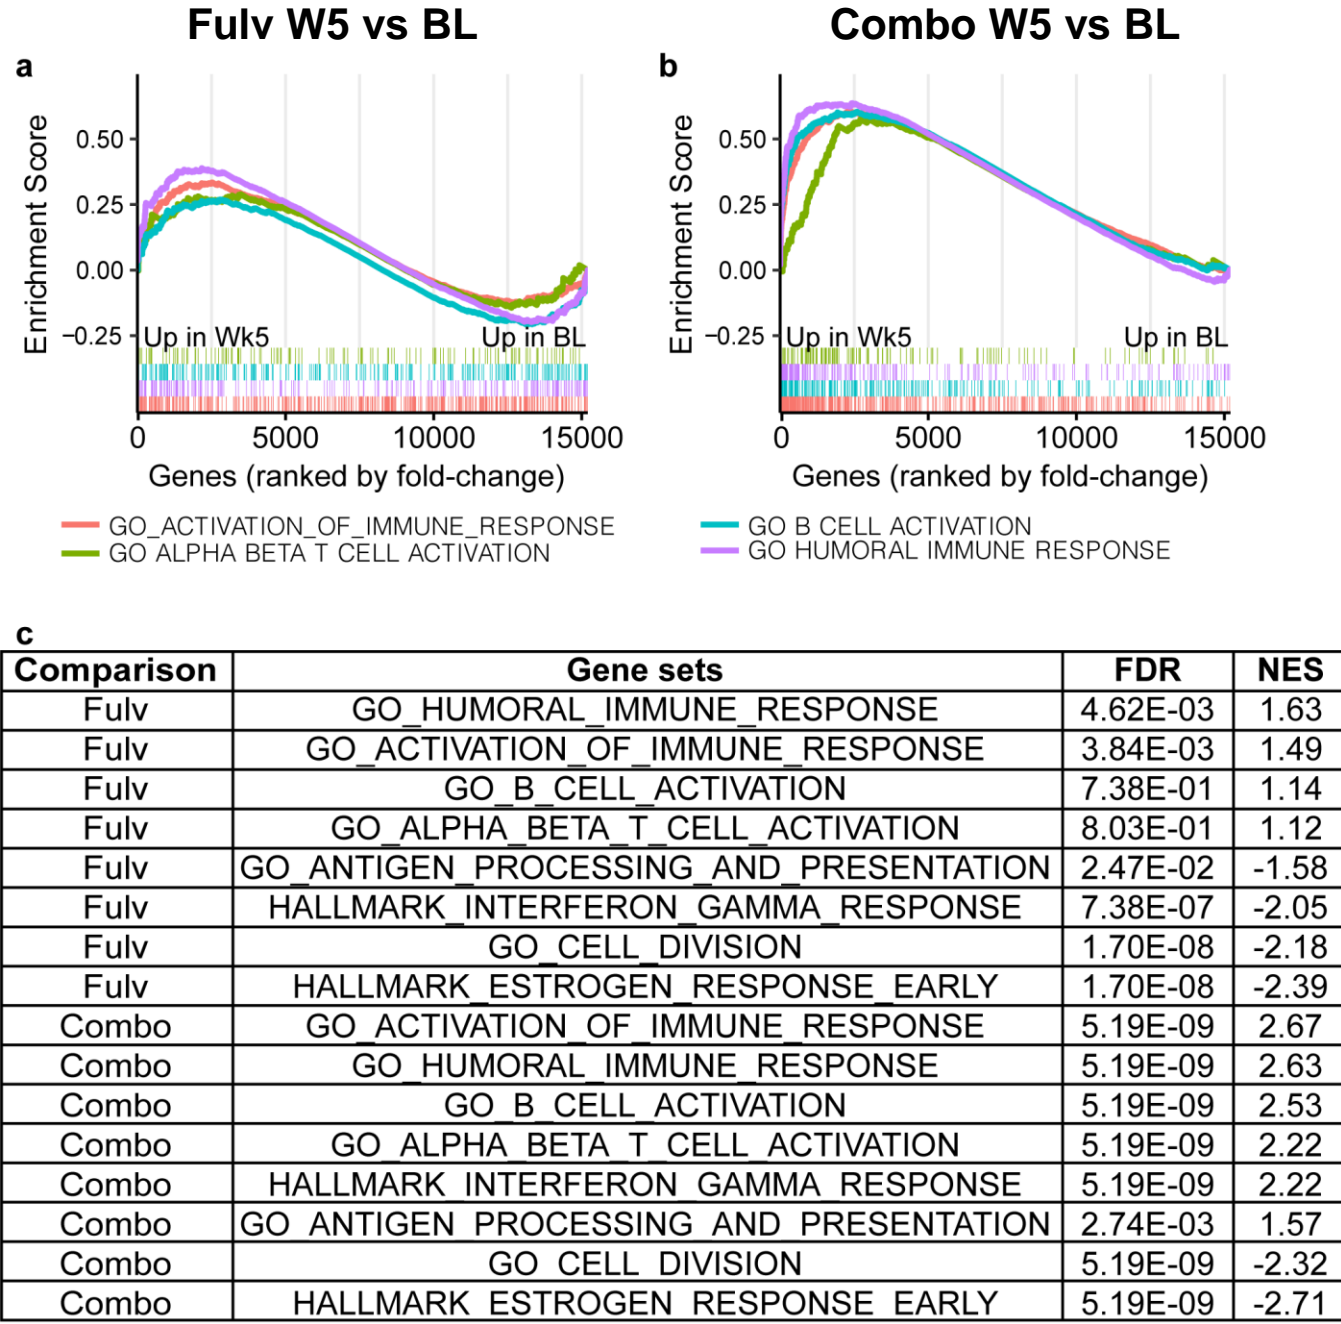

**Supplementary Figure 12. Select immune pathway enrichment by treatment of Fulvestrant-only or in combination with enzalutamide.** GSEA plots displaying select pathways in each comparison (**a**, **b**). Below the enrichment score are ticks indicating the ranked positions of genes from each gene set (positive to negative fold-change). **c** Table displaying GSEA statistics for select gene sets. FDR, false discovery rate; NES, normalized enrichment score.

Supplementary Discussion 1. Ki67 Agreement Analysis

A linear mixed effect model with a random intercept for subject was used to assess the univariate association between RPPA Ki67 and IHC Ki67. RPPA Ki67 was log-transformed to improve model fit and one leverage point was removed. The regression line and its 95% prediction interval was plotted to assess agreement.<sup>1</sup> The model was fit with the lme4<sup>2</sup> R package and plots were constructed with the ggeffects<sup>3</sup> package. High levels of agreement between RPPA and IHC Ki67 at the given threshold are demonstrated.

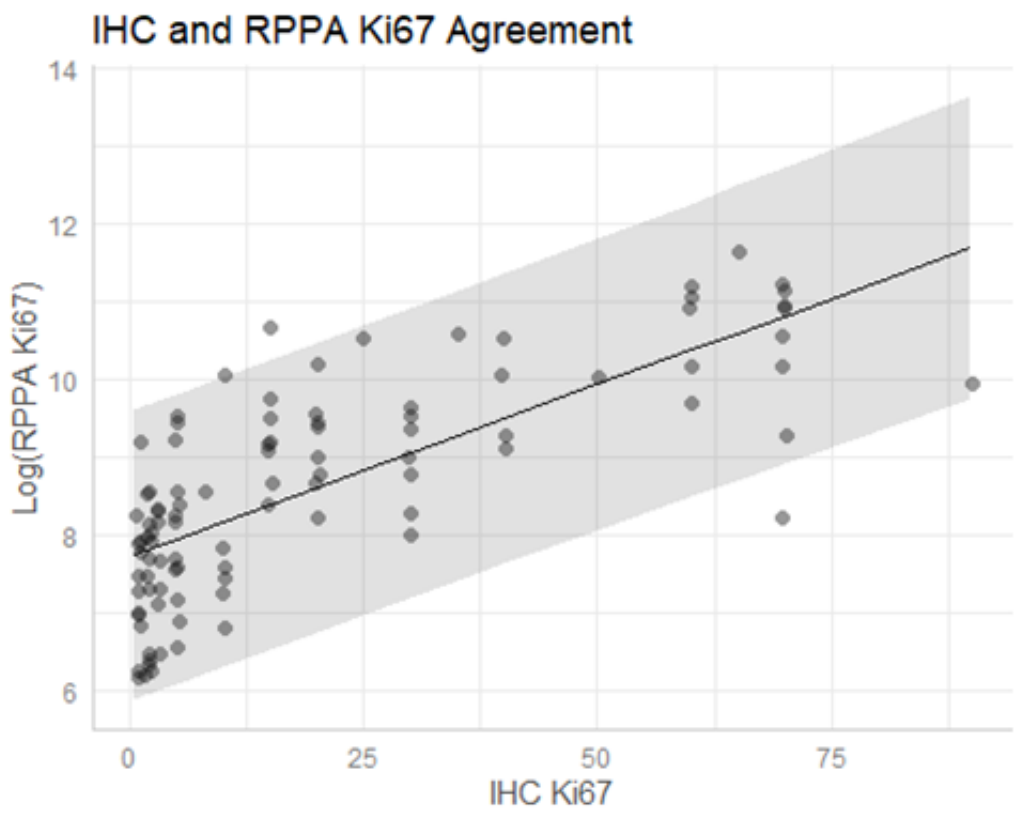

| Predictor | Estimate | CI          | p-value |
|-----------|----------|-------------|---------|
| IHC       | 1.05     | 1.04 – 1.05 | <0.001  |

IHC Ki67 is a highly significant predictor of RPPA Ki67 ( $p<0.001$ ). The agreement between RPPA Ki67 and IHC Ki67 is visualized by a plot of the regression line and corresponding 95% prediction bands. The regression line estimates the expected value of log(RPPA Ki67) based on IHC Ki67. The 95% prediction interval shows the uncertainty around the prediction estimate and the scattered points represent the observed values. Since the observed values generally fall within the prediction interval, this plot indicates good agreement at the given threshold.

References

1. Bland, J.M. & Altman, D.G. Applying the right statistics: analyses of measurement studies. *Ultrasound Obstet. Gynecol.* **22**, 85–93 (2003).

2. Bates, D., Mächler, M., Bolker, B. & Walker, S. Fitting Linear Mixed-Effects Models Using lme4. **67**(2015).

3. Lüdtcke, D. ggeffects: Tidy Data Frames of Marginal Effects from Regression Models. *Journal of Open Source Software* **3**, 772 (2018).

**Supplementary Data 1. Gene expression analysis from RNA from baseline (BL) and week 5 (W5) of treatment tumors.** Differential gene expression of fulvestrant-treated samples at W5 as compared to matched baseline analyzed as described in methods.

**Supplementary Data 2. Gene expression analysis from RNA from baseline (BL) and week 5 (W5) of treatment tumors.** Differential gene expression of combination-treated samples at W5 as compared to matched baseline analyzed as described in methods.

**Supplementary Data 3. Gene set enrichment analysis (GSEA) from gene expression analysis of RNA from baseline (BL) versus week 5 (W5) of treatment.** Fulvestrant-treated samples at W5 as compared to matched BL.

**Supplementary Data 4. Gene set enrichment analysis (GSEA) from gene expression analysis of RNA from baseline (BL) versus week 5 (W5) of treatment.** Combination-treated samples at W5 as compared to matched BL.
